# Supplementary material
Source: PubMed Central journal article supplement (PMC7007275)
Supplement: nn9b01774_si_001.pdf [file nn9b01774_si_001.pdf]

# Supporting Information: The Skin You're In: Design of Experiments Optimization of Lipid Nanoparticle Self-Amplifying RNA Formulations in Human Skin Explants

Anna K. Blakney<sup>†</sup>, Paul F. McKay<sup>†</sup>, Bárbara Ibarzo Yus<sup>†</sup>, Judith E. Hunter<sup>‡</sup>, Elizabeth A. Dex<sup>‡</sup>,  
Robin J. Shattock<sup>†,\*</sup>

<sup>†</sup> Department of Medicine, Imperial College London, London, W21PG, United Kingdom

<sup>‡</sup> Department of Plastic Surgery, Imperial NHS Trust, London, W68RF, United Kingdom

FIGURES

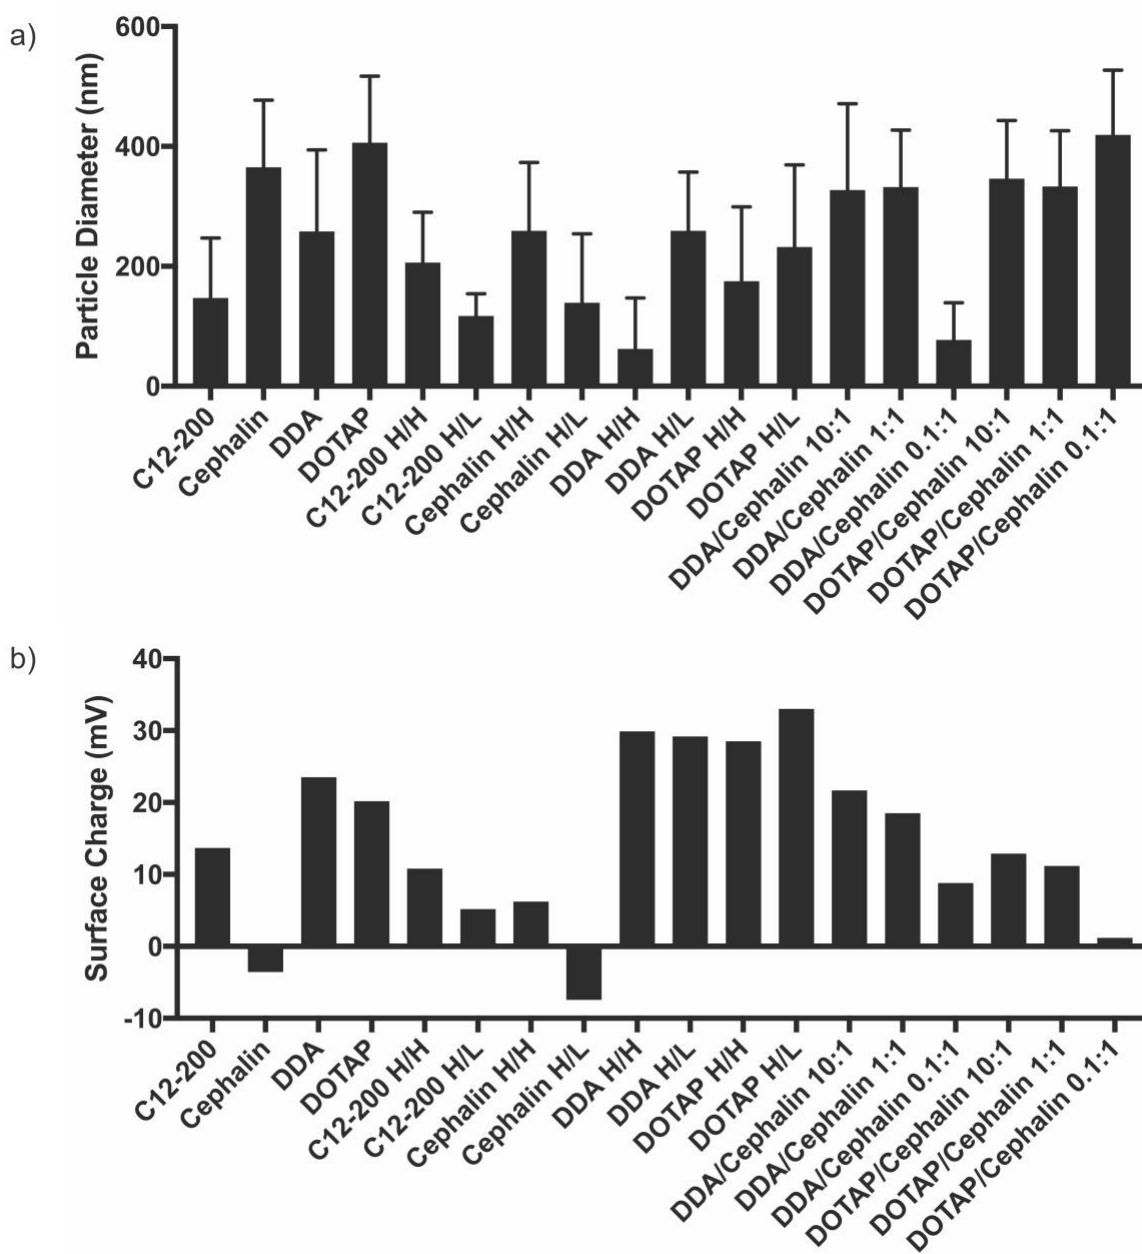

**Figure S1.** Characterization of lipid nanoparticle a) diameter and b) surface charge.

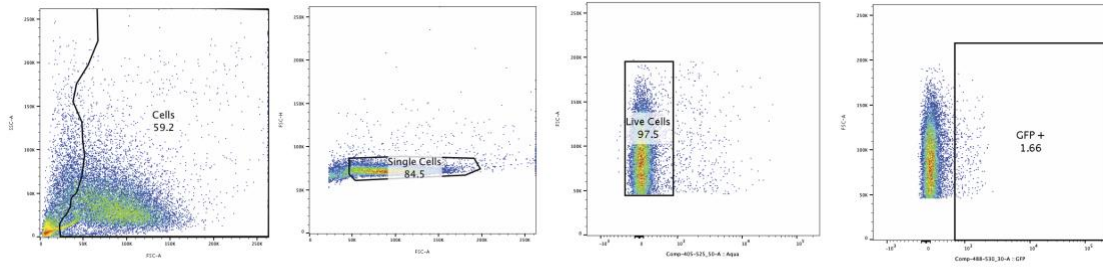

**Figure S2.** Gating strategy for eGFP expressing cells from human skin explants as determined by flow cytometry after three days of culture.

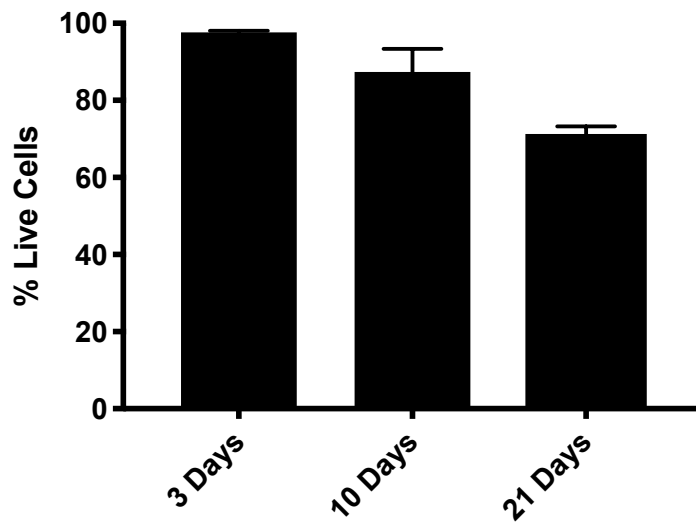

**Figure S3.** Explant viability over the course of 21 days as determined by flow cytometry.

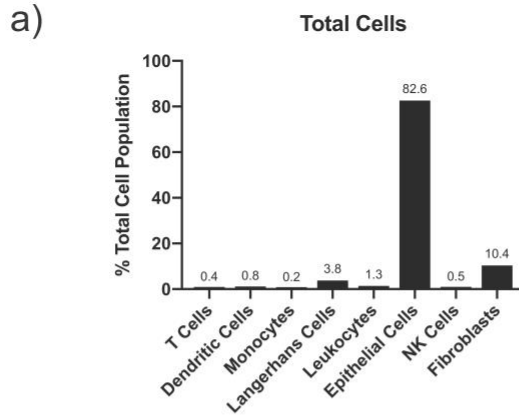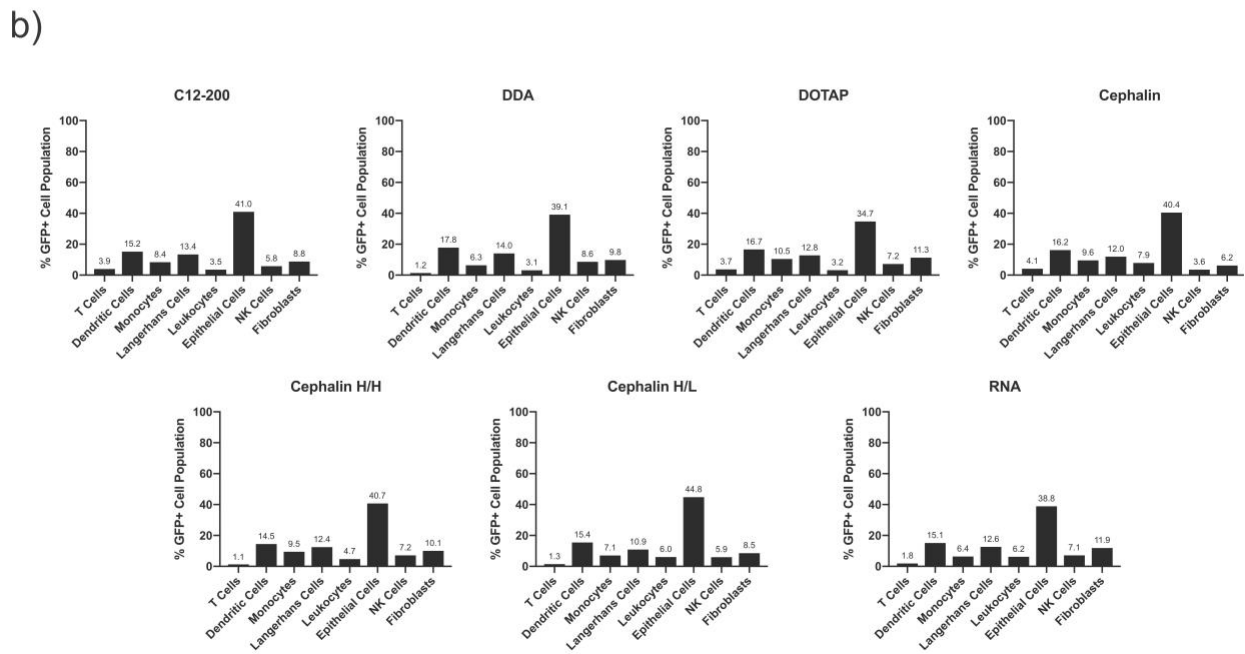

Figure S4. Identity of cells present in human skin explants and GFP+ cells after ID injection of LNP formulations as determined by flow cytometry after three days of culture. a) Identity of cells present in human skin explants. b) Identity of GFP-expressing skin cells from explants treated with LNP-formulation RNA. The bar represents the mean for n=3, and the mean is detailed on top of each bar for each cell type.

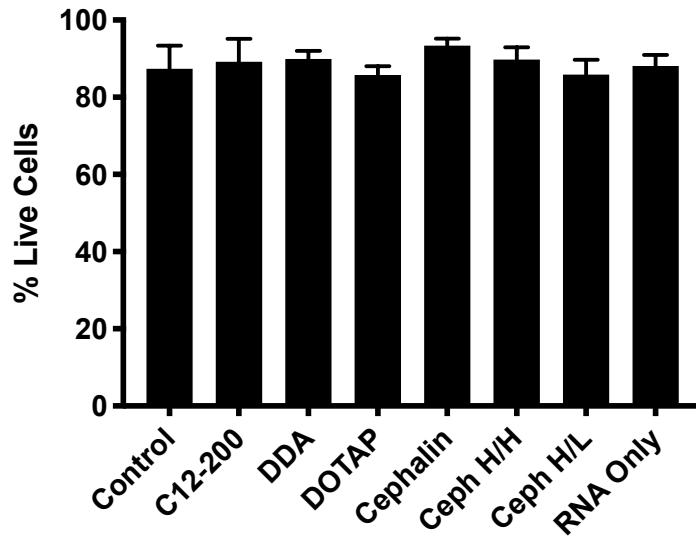

Figure S5. Skin explant cell viability in response to LNP-formulation saRNA, as determined by live/dead staining and flow cytometry after three days of culture.

TABLES

**Table S1.** Panel of antibodies used to identify GFP expressing cells in human skin explants.

| Antibody | Labelling        | Clone | Vendor    | Test Volume (μL) |
|----------|------------------|-------|-----------|------------------|
| CD1a     | PerCP-eFluor 710 | HI149 | Biolegend | 5                |
| CD3      | eFluor 450       | OKT3  | Biolegend | 5                |
| CD14     | Qdot 605         | Tük4  | Biolegend | 1                |
| CD11c    | PE               | 3.9   | Biolegend | 5                |
| CD45     | Alexafluor 700   | 2D1   | Biolegend | 2                |
| CD56     | PE-Cy5           | CMSSB | Biolegend | 5                |
| CD90     | PE-Cy7           | 5E10  | Biolegend | 5                |
